# Supplementary material for: Bio-Derived Carbon with Tailored Hierarchical Pore Structures and Ultra-High Specific Surface Area for Superior and Advanced Supercapacitors
Source: MDPI journal article supplement (doi:10.3390/nano12010027), 2021-12-23
Supplement: s1 [file s1]

## Supporting Information

# Bio-derived Carbon with Tailored Hierarchical Pore Structures and Ultra-high Specific Surface Area for Superior and Advanced Supercapacitors

Fuming Zhang<sup>1</sup>, Xiangshang Xiao<sup>1</sup>, Dayakar Gandla<sup>1</sup>, Zhaoxi Liu<sup>1</sup>, Daniel Tan<sup>1,2\*</sup> and Yair Ein-Eli<sup>2,3\*</sup>

<sup>1</sup> Department of Materials Science and Engineering, Guangdong Technion - Israel Institute of Technology, 241 Daxue Road, Jinping District, Shantou, Guangdong 515063, China

<sup>2</sup> Department of Materials Science and Engineering, Technion - Israel Institute of Technology, Haifa 3200003, Israel

<sup>3</sup> Grand Technion Energy program (GTEP) Technion - Israel Institute of Technology, Haifa 3200003, Israel

\* Correspondence: daniel.tan@gtiit.edu.cn(D.G.), eineli@technion.ac.il(Y.E-E.)

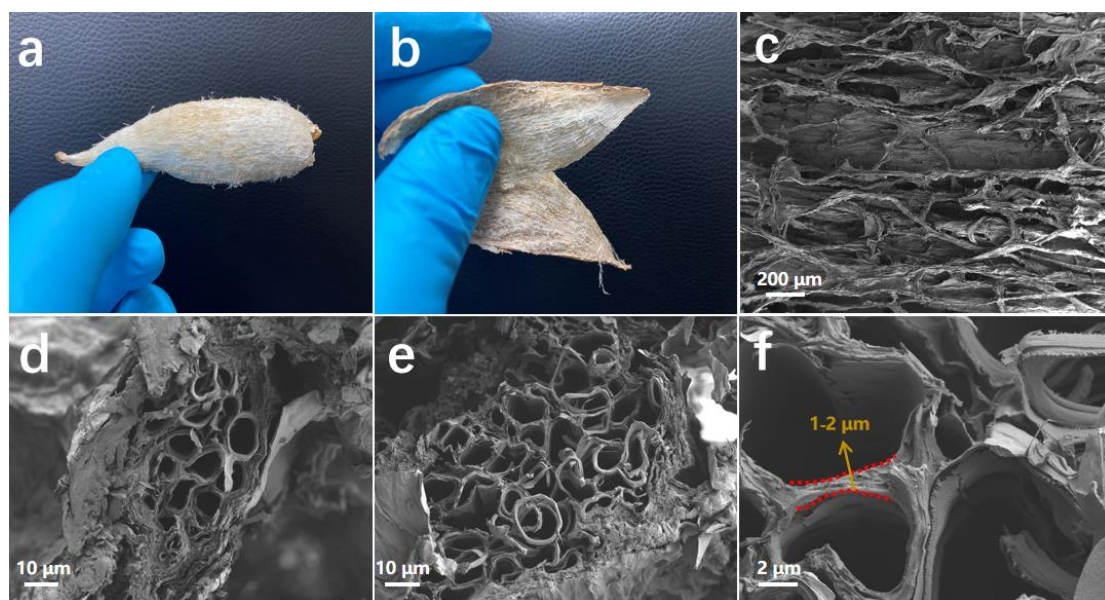

**Figure S1.** Digital photo a) and b) *Metaplexis Japonica* overall and surface morphology; SEM image of precursor c)-d) at different magnification.

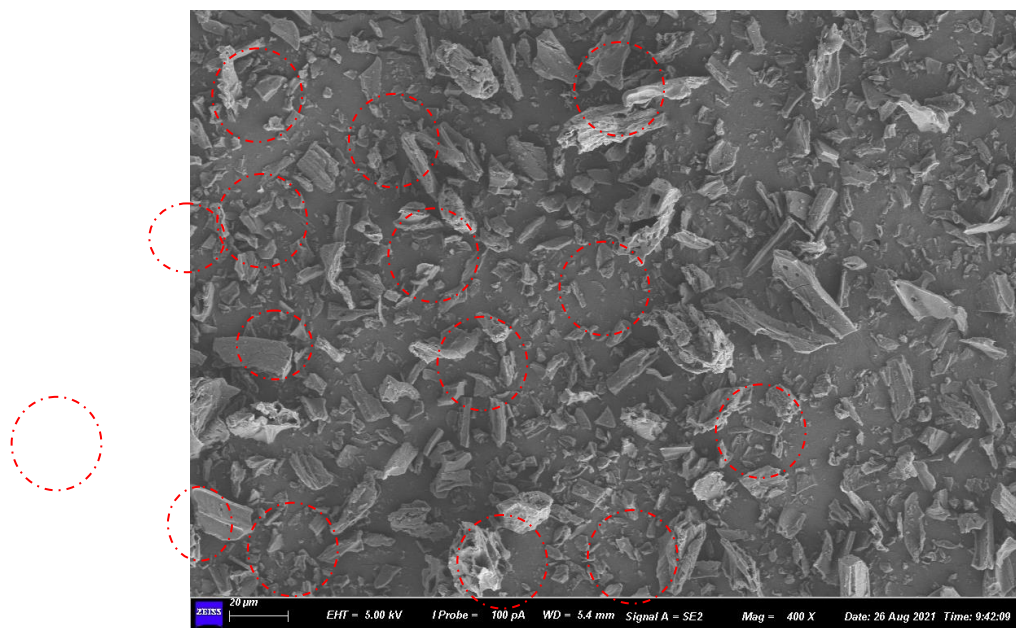

**Figure S2.** SEM image of MJ-5.

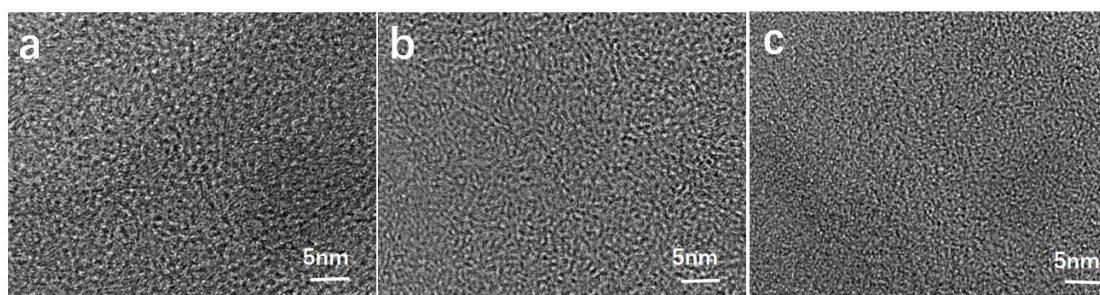

**Figure S3.** TEM image of a) MJ-1 b) MJ-3 c) MJ-5.

**Table S1.** Structural characteristics of the carbon materials.

| Samples | $S_{\text{BET}}$<br>$S_{\text{a-total}}$<br>( $\text{m}^2 \text{g}^{-1}$ ) | $S_{\text{micro}}^{\text{a}}$<br>( $\text{m}^2 \text{g}^{-1}$ ) | $S_{\text{meso}}^{\text{a}}$<br>( $\text{m}^2 \text{g}^{-1}$ ) | Pore vol-<br>ume-total<br>( $\text{cm}^3 \text{g}^{-1}$ ) | Pore volume-<br>meso( $\text{cm}^3 \text{g}^{-1}$ ) | C content<br>(%) | O con-<br>tent (%) |
|---------|----------------------------------------------------------------------------|-----------------------------------------------------------------|----------------------------------------------------------------|-----------------------------------------------------------|-----------------------------------------------------|------------------|--------------------|
| YP-50   | 1868                                                                       | 1747                                                            | 102                                                            | 0.807                                                     | 0.164                                               | 86.0             | 14.0               |
| MJ-1    | 1917                                                                       | 1855                                                            | 62                                                             | 0.796                                                     | 0.107                                               | 83.7             | 16.3               |
| MJ-3    | 2783                                                                       | 2394                                                            | 333                                                            | 1.597                                                     | 0.439                                               | 86.5             | 13.5               |
| MJ-5    | 3635                                                                       | 2976                                                            | 559                                                            | 2.017                                                     | 0.595                                               | 92.2             | 7.8                |

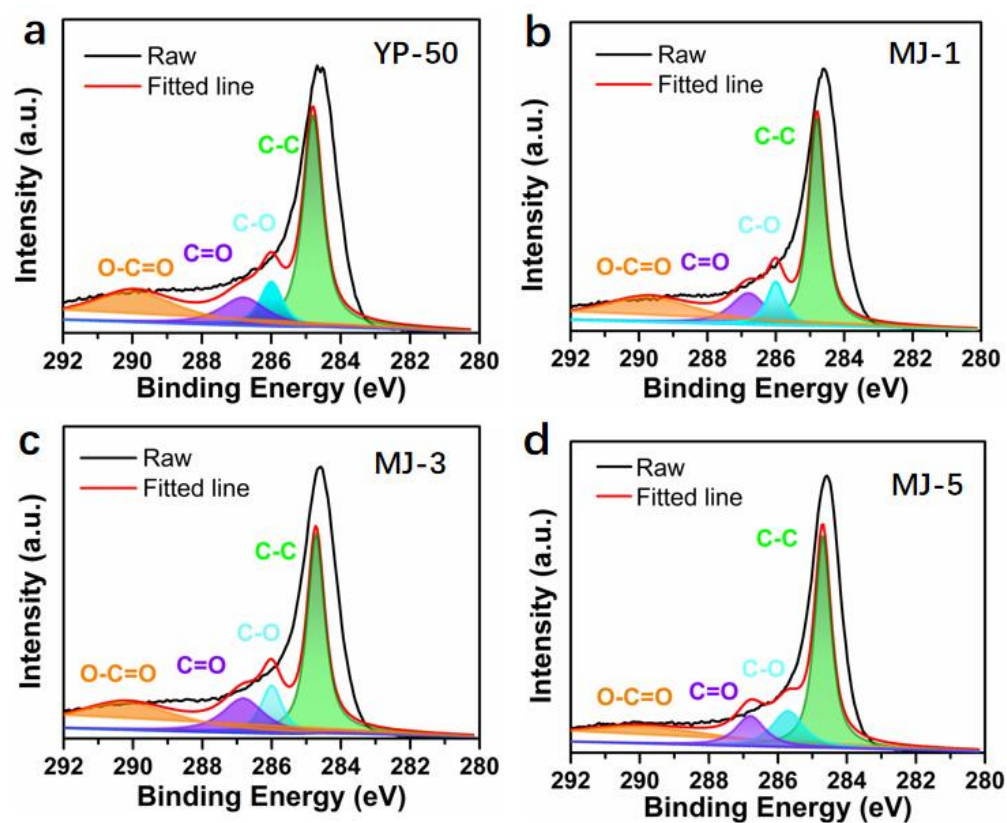

Figure S4. High-resolution C1s spectra of MJ-x and YP-50.

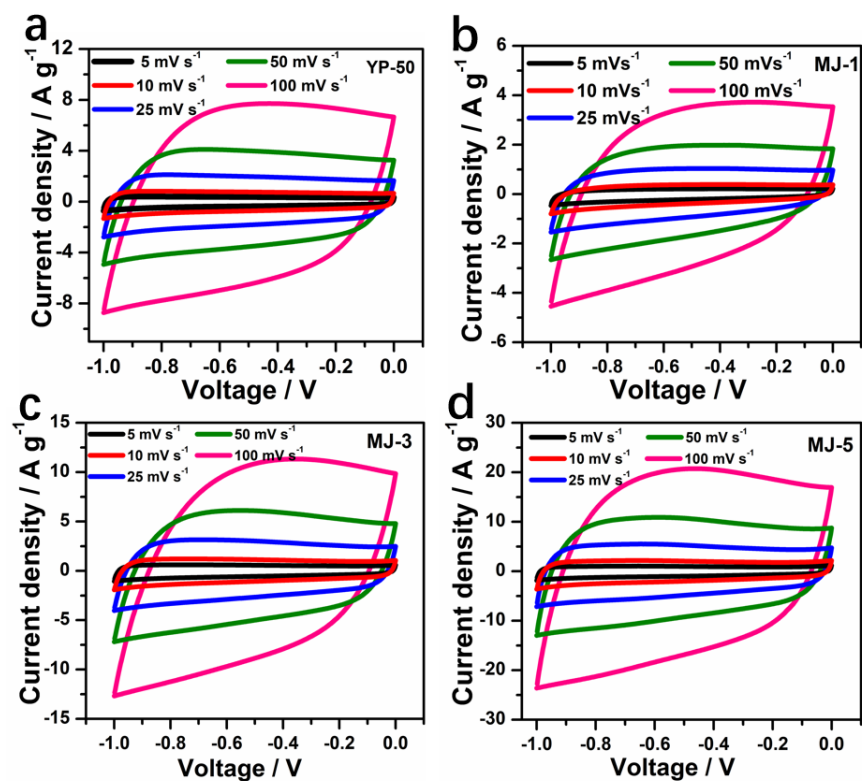

Figure S5. CV curves from 5 mV s<sup>-1</sup> to 100 mV s<sup>-1</sup> in 6M KOH. a) YP50 b) MJ-1 c) MJ-3 d) MJ-5.

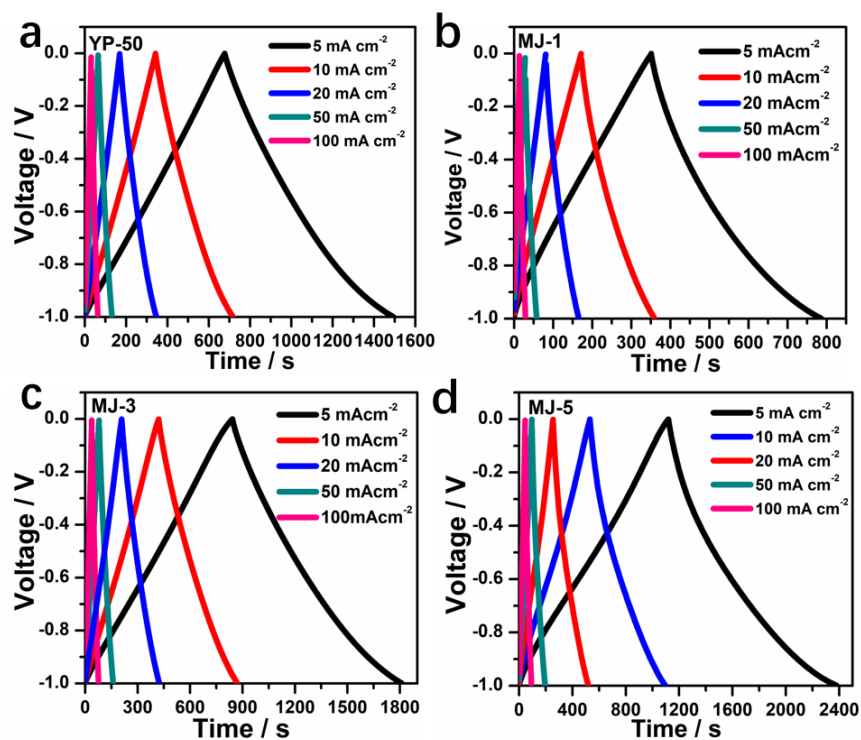

**Figure S6.** GCD plots from 5 mV s<sup>-1</sup> to 100 mV s<sup>-1</sup> in 6M KOH. a) YP50 b) MJ-1 c) MJ-3 d) MJ-5.

**Table S2.** The detailed ion size information.

| DMP <sup>+</sup>                                                                    | SBP <sup>+</sup>                                                                    | TEA <sup>+</sup>                                                                    | BF <sub>4</sub> <sup>-</sup>                                                        | ACN                                                                                   |
|-------------------------------------------------------------------------------------|-------------------------------------------------------------------------------------|-------------------------------------------------------------------------------------|-------------------------------------------------------------------------------------|---------------------------------------------------------------------------------------|
| 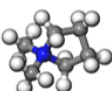 |  |  |  |  |
|  |  |  |  |  |
| <b>size/Å (from top to bottom is length, width and height)</b>                      |                                                                                     |                                                                                     |                                                                                     |                                                                                       |
| 6.516                                                                               | 9.009                                                                               | 7.403                                                                               | 4.678                                                                               | 5.731                                                                                 |
| 7.034                                                                               | 6.405                                                                               | 8.841                                                                               | 4.678                                                                               | 4.184                                                                                 |
| 6.044                                                                               | 6.194                                                                               | 7.113                                                                               | 4.630                                                                               | 3.949                                                                                 |
| <b>Van der Waals volume/Å<sup>3</sup></b>                                           |                                                                                     |                                                                                     |                                                                                     |                                                                                       |
| 117.29                                                                              | 143.30                                                                              | 162.08                                                                              | 49.27                                                                               | 45.55                                                                                 |



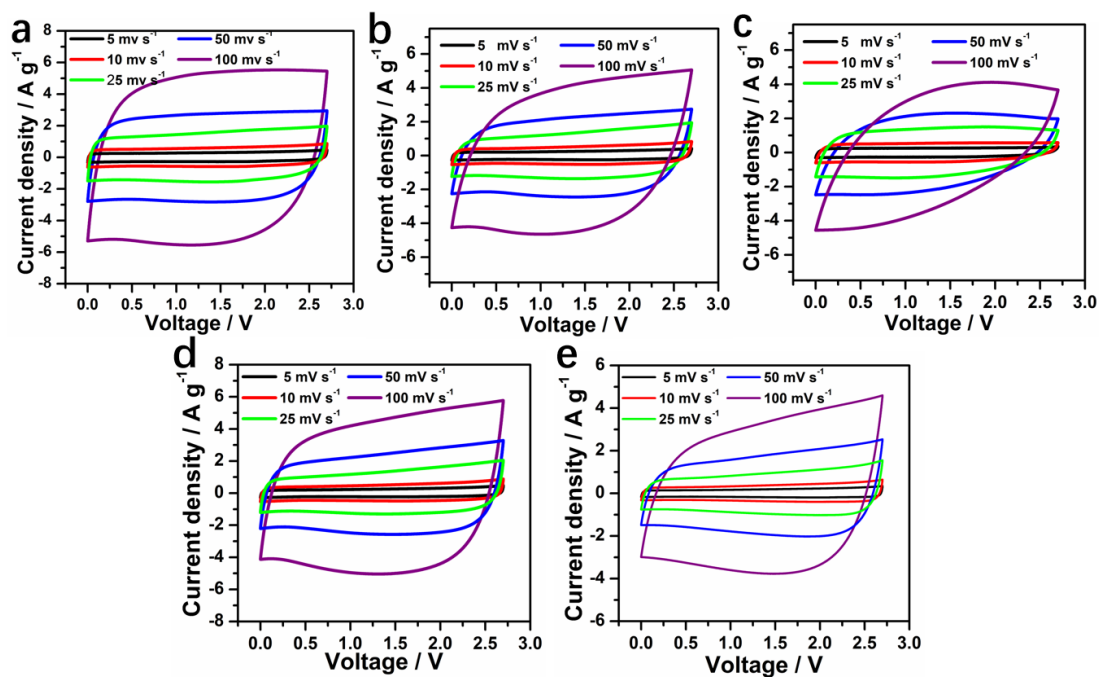

**Figure S7.** CV curves of MJ-x in different organic electrolyte. a) MJ-5 in DMPBF<sub>4</sub> b) MJ-5 in SBPBF<sub>4</sub> c) MJ-5 in TEABF<sub>4</sub> d) MJ-3 in DMPBF<sub>4</sub> e) MJ-1 in DMPBF<sub>4</sub>.

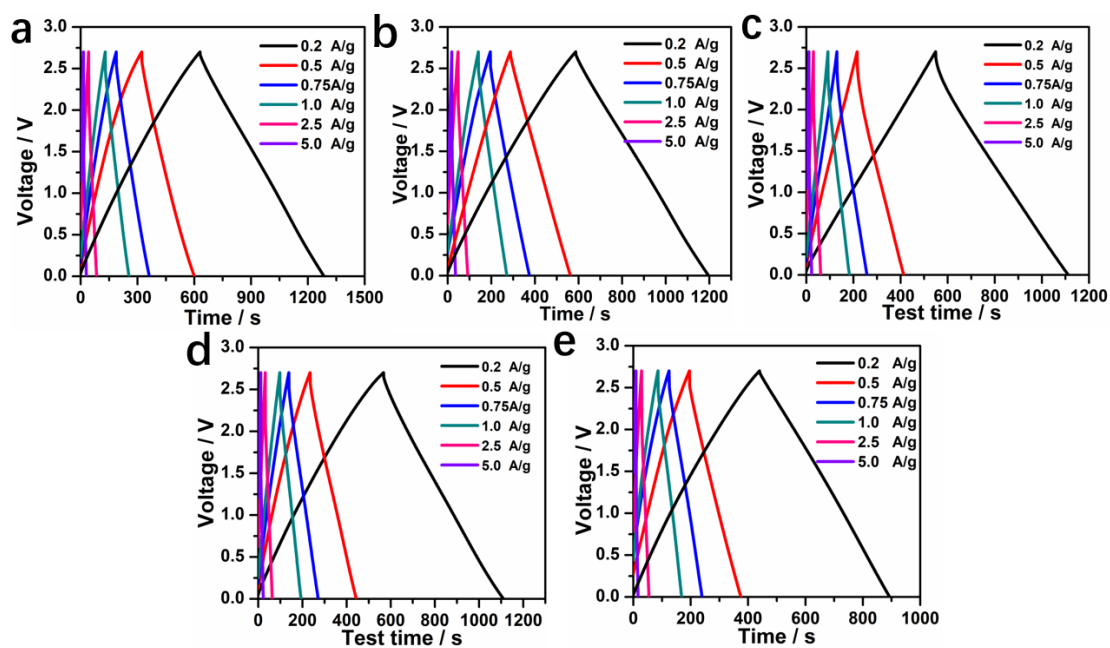

**Figure S8.** GCD plots of MJ-x in different organic electrolyte. a) MJ-5 in DMPBF<sub>4</sub> b) MJ-5 in SBPBF<sub>4</sub> c) MJ-5 in TEABF<sub>4</sub> d) MJ-3 in DMPBF<sub>4</sub> e) MJ-1 in DMPBF<sub>4</sub>.

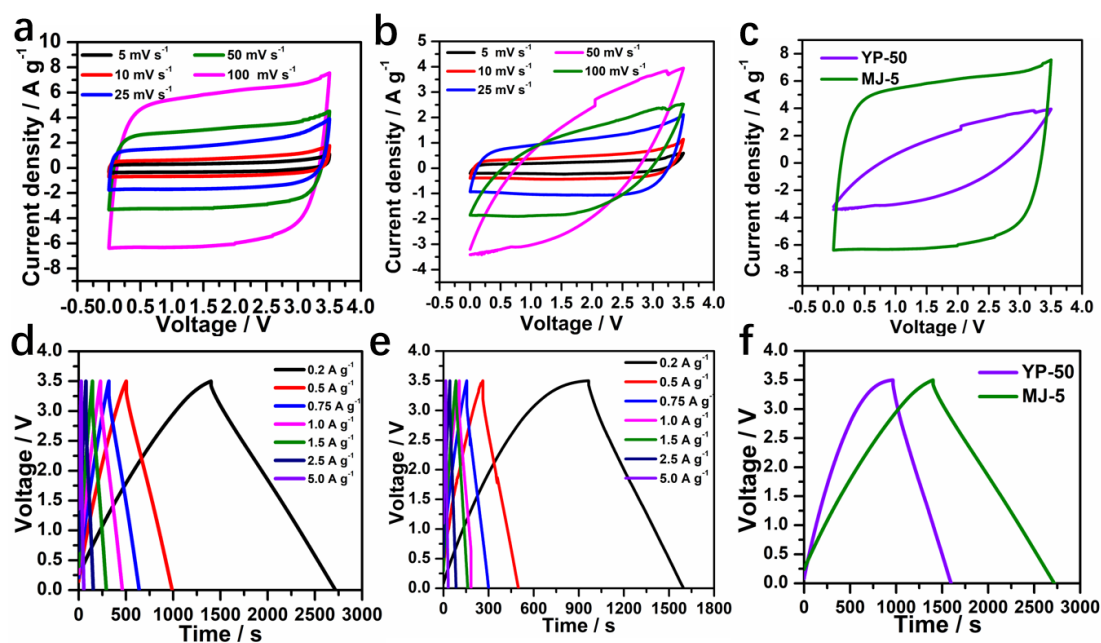

**Figure S9.** Electrochemical performance of MJ-5 and YP-50 in ionic liquid electrolyte. CV curves of a) MJ-5 b) YP-50 c) Comparison of CV curves at 100  $\text{mV s}^{-1}$ ; GCD plots of d) MJ-5 e) YP-50 f) Comparison of GCD plots at 0.2  $\text{A g}^{-1}$ .
